# Supplementary material for: A massively parallel reporter assay library to screen short synthetic promoters in mammalian cells
Source: PubMed Central journal article supplement (PMC11604768; doi:10.1038/s41467-024-54502-9), 2024-11-28
Supplement: 41467_2024_54502_MOESM2_ESM.pdf [file 41467_2024_54502_MOESM2_ESM.pdf]

## **Description of Additional Supplementary Files**

File Name: Supplementary Data 1

Description: Table of treatment conditions.

File Name: Supplementary Data 2

Description: Table of transcription factor binding motifs (TFBMs) used to generate candidate promoters.

File Name: Supplementary Data 3

Description: Table of TRE units.

File Name: Supplementary Data 4

Description: Table of primers.

File Name: Supplementary Data 5

Description: Table of plasmids.

File Name: Supplementary Data 6

Description: Table of promoters displayed in Figure 5B from top to bottom.

File Name: Supplementary Data 7

Description: Table of promoters displayed in Figure S8B from top to bottom.
